# Supplementary material for: Highly efficient multi-site synergistic catalysis of a polyoxovanadate-based metal–organic framework for benzylic C–H bond oxidation
Source: Royal Society of Chemistry journal article supplement (doi:10.1039/d2ta03886b), 2022-01-01
Supplement: d2ta03886b1.pdf [file d2ta03886b1.pdf]

### Supporting Information

#### **Highly efficient multi-sites synergistic catalysis of a polyoxovanadate-based metal–organic framework for benzylic C-H bonds oxidation**

Tian-Yi Dang,<sup>a†</sup> Run-Han Li,<sup>a†</sup> Hong-Rui Tian,<sup>b</sup> Wei Guan,<sup>a</sup> Ying Lu<sup>\*a</sup> and Shu-Xia Liu<sup>\*a</sup>

*<sup>a</sup>Key Laboratory of Polyoxometalate and Reticular Material Chemistry of the Ministry of Education, College of Chemistry, Northeast Normal University, Changchun, Jilin 130024, P. R. China.*

*<sup>b</sup>Department of Chemistry and Shenzhen Grubbs Institute, Southern University of Science and Technology, Shenzhen, Guangdong 518055, P. R. China*

*E-mail: [luy968@nenu.edu.cn](mailto:luy968@nenu.edu.cn); [liusx@nenu.edu.cn](mailto:liusx@nenu.edu.cn)*

## Table of Contents

|    |                                                                    |     |
|----|--------------------------------------------------------------------|-----|
| 1  | Crystallographic Data and Structure Refinements.....               | S3  |
| 2  | The asymmetric unit of <b>1</b> .....                              | S5  |
| 3  | PXRD patterns of <b>1</b> .....                                    | S5  |
| 4  | FTIR Spectrum of <b>1</b> .....                                    | S6  |
| 5  | Raman Spectrum of <b>1</b> .....                                   | S6  |
| 6  | XPS Spectra of V and Cu in <b>1</b> .....                          | S7  |
| 7  | BVS for the copper ions and vanadium ions in <b>1</b> .....        | S7  |
| 8  | TGA curve of <b>1</b> .....                                        | S8  |
| 9  | PXRD patterns of <b>1</b> after immersing in various solvents..... | S8  |
| 10 | BET Analysis of <b>1</b> .....                                     | S9  |
| 11 | Radical trapping experiments.....                                  | S9  |
| 12 | Frontier molecular orbital diagrams of <b>1</b> .....              | S10 |
| 13 | Adsorption of <i>t</i> BuOOH on active sites in <b>1</b> .....     | S10 |
| 14 | Recycling tests of the <b>1</b> .....                              | S11 |
| 15 | SEM images of <b>1</b> .....                                       | S11 |
| 16 | Comparison of <b>1</b> and partially reported catalysts .....      | S12 |
| 17 | <sup>1</sup> H-NMR Spectra of the ketones .....                    | S13 |
| 18 | References.....                                                    | S17 |

## 1. Crystallographic Data and Structure Refinements

**Table S1.** Crystallographic data and structure refinement of **1**

| Name                                             | <b>1</b>                                                                                      |
|--------------------------------------------------|-----------------------------------------------------------------------------------------------|
| Empirical formula                                | C <sub>28</sub> H <sub>28</sub> Cu <sub>3</sub> N <sub>8</sub> O <sub>12</sub> V <sub>4</sub> |
| Formula weight                                   | 1062.96                                                                                       |
| Temperature (K)                                  | 297.52                                                                                        |
| Wave length (Å)                                  | 0.71073                                                                                       |
| Crystal system                                   | monoclinic                                                                                    |
| Space group                                      | P2 <sub>1</sub> /c                                                                            |
| a (Å)                                            | 16.059(3)                                                                                     |
| b (Å)                                            | 14.643(2)                                                                                     |
| c (Å)                                            | 7.9460(12)                                                                                    |
| α (deg)                                          | 90                                                                                            |
| β (deg)                                          | 108.842(3)                                                                                    |
| γ (deg)                                          | 90                                                                                            |
| Volume (Å <sup>3</sup> )                         | 1768.4(5)                                                                                     |
| Z, Dcalc (Mg/m <sup>3</sup> )                    | 2, 1.996                                                                                      |
| Absorption coefficient (mm <sup>-1</sup> )       | 2.853                                                                                         |
| F (000)                                          | 1054.0                                                                                        |
| Crystal size (mm <sup>3</sup> )                  | 0.21 × 0.2 × 0.15                                                                             |
| θ range (deg)                                    | 2.782 to 25.384                                                                               |
| index range (deg)                                | -19 ≤ h ≤ 19, -17 ≤ k ≤ 17, -9 ≤ l ≤ 9                                                        |
| Reflections collected / unique                   | 28158 / 3241 [R <sub>int</sub> = 0.2036]                                                      |
| Data / restraints / parameters                   | 3241 / 0 / 250                                                                                |
| Goodness-of-fit on F <sup>2</sup>                | 1.008                                                                                         |
| R1, wR <sub>2</sub> (I > 2σ(I))                  | 0.0443, 0.0842                                                                                |
| R1, wR <sub>2</sub> (all data)                   | 0.1188, 0.1108                                                                                |
| Largest diff. peak and hole (e Å <sup>-3</sup> ) | 0.55, -0.74                                                                                   |

$$R_1 = \frac{\sum ||F_o| - |F_c||}{\sum |F_o|} \cdot wR_2 = \left[ \frac{\sum [w(F_o^2 - F_c^2)^2]}{\sum [w(F_o^2)^2]} \right]^{1/2}$$

**Table S2.** Selected bond lengths [Å] and angles [deg] for **1**

| <b>1</b>                                   |            |                                            |           |
|--------------------------------------------|------------|--------------------------------------------|-----------|
| Cu(1)-O(1)                                 | 1.888(4)   | Cu(1)-O(1) <sup>1</sup>                    | 1.888(4)  |
| Cu(1)-N(4) <sup>2</sup>                    | 1.999(5)   | Cu(1)-N(4) <sup>3</sup>                    | 1.999(5)  |
| Cu(2)-O(6)                                 | 1.839(4)   | Cu(2)-O(2) <sup>4</sup>                    | 2.417(5)  |
| Cu(2)-O(5)                                 | 2.465(5)   | Cu(2)-N(1)                                 | 1.880(5)  |
| V(1)-O(2)                                  | 1.598(5)   | V(1)-O(1)                                  | 1.668(4)  |
| V(1)-O(3)                                  | 1.759(4)   | V(1)-O(4)                                  | 1.780(4)  |
| V(2)-O(4)                                  | 1.790(4)   | V(2)-O(5)                                  | 1.619(4)  |
| V(2)-O(3) <sup>5</sup>                     | 1.806(4)   | V(2)-O(6)                                  | 1.651(4)  |
| O(1)-Cu(1)-O(1) <sup>1</sup>               | 180.0      | O(1)-Cu(1)-N(4) <sup>2</sup>               | 90.28(18) |
| O(1)-Cu(1)-N(4) <sup>3</sup>               | 89.72(18)  | O(1) <sup>1</sup> -Cu(1)-N(4) <sup>3</sup> | 90.28(18) |
| O(1) <sup>1</sup> -Cu(1)-N(4) <sup>2</sup> | 89.72(18)  | N(4) <sup>2</sup> -Cu(1)-N(4) <sup>3</sup> | 180.0     |
| O(6)-Cu(2)-O(2) <sup>4</sup>               | 90.00(19)  | O(6)-Cu(2)-N(1)                            | 163.9(2)  |
| N(1)-Cu(2)-O(2) <sup>4</sup>               | 100.9(2)   | O(2)-V(1)-O(1)                             | 111.4(3)  |
| O(2)-V(1)-O(3)                             | 110.0(2)   | O(2)-V(1)-O(4)                             | 107.8(2)  |
| O(1)-V(1)-O(3)                             | 109.4(2)   | O(1)-V(1)-O(4)                             | 107.4(2)  |
| O(3)-V(1)-O(4)                             | 110.77(19) | O(6)-V(2)-O(3) <sup>5</sup>                | 110.0(2)  |
| O(6)-V(2)-O(4)                             | 107.5(2)   | O(5)-V(2)-O(6)                             | 110.6(2)  |
| O(5)-V(2)-O(3) <sup>5</sup>                | 108.9(2)   | O(5)-V(2)-O(4)                             | 111.0(2)  |
| O(4)-V(2)-O(3) <sup>5</sup>                | 108.84(19) |                                            |           |

<sup>1</sup> -X,1-Y,-1-Z; <sup>2</sup> 1-X,-1/2+Y,3/2-Z; <sup>3</sup> -1+X,3/2-Y,-5/2+Z; <sup>4</sup> +X,+Y,1+Z; <sup>5</sup> +X,3/2-Y,1/2+Z.

## 2. The asymmetric unit of 1

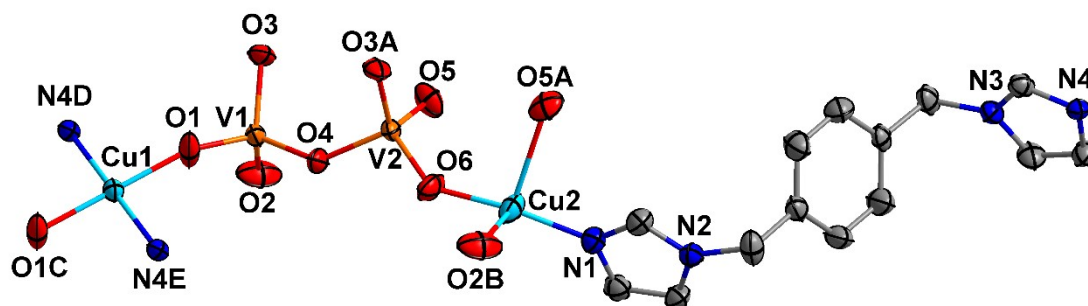

**Figure S1.** The asymmetric unit of **1**. Asymmetric codes: A,  $x, 3/2-y, 1/2+z$ ; B,  $x, y, 1+z$ ; C,  $-x, 1-y, -1-z$ ; D,  $-1+x, 3/2-y, -5/2+z$ ; E,  $1-x, -1/2+y, 3/2-z$ .

## 3. PXRD patterns of 1

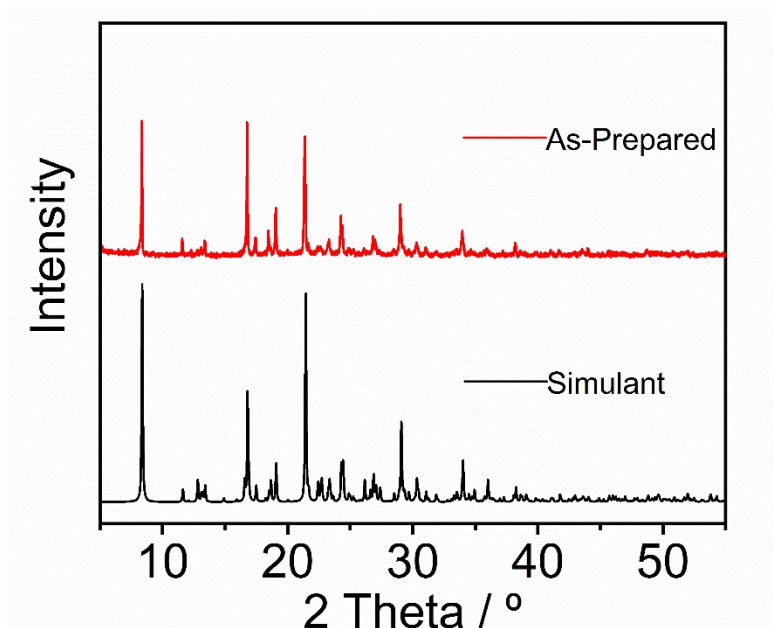

**Figure S2.** The PXRD patterns of **1**.

#### 4. FTIR Spectrum of 1

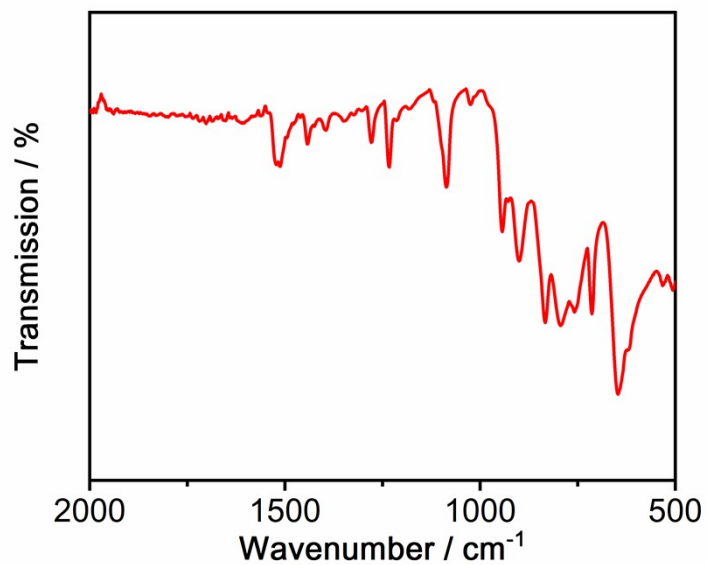

**Figure S3.** The FTIR spectrum of **1**.

#### 5. XPS Spectra of V and Cu in 1

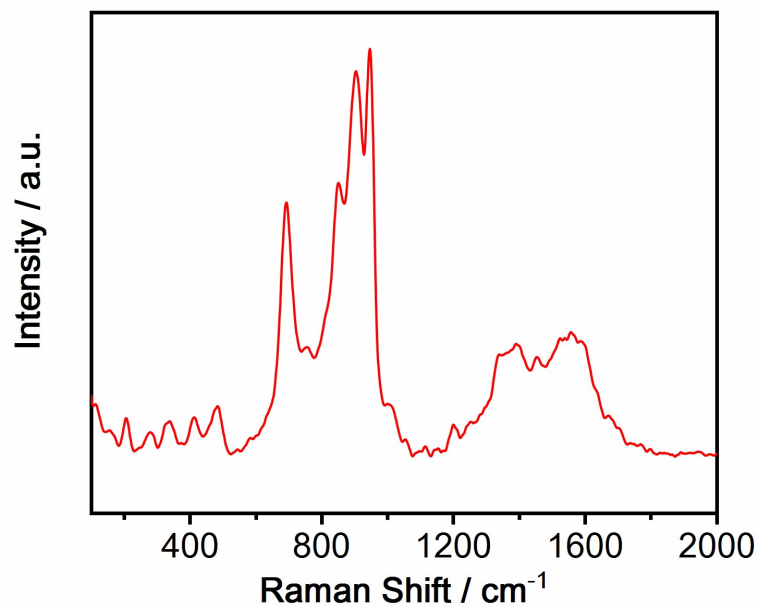

**Figure S4.** The Raman spectrum of **1**.

## 6. XPS Spectra of V and Cu in 1

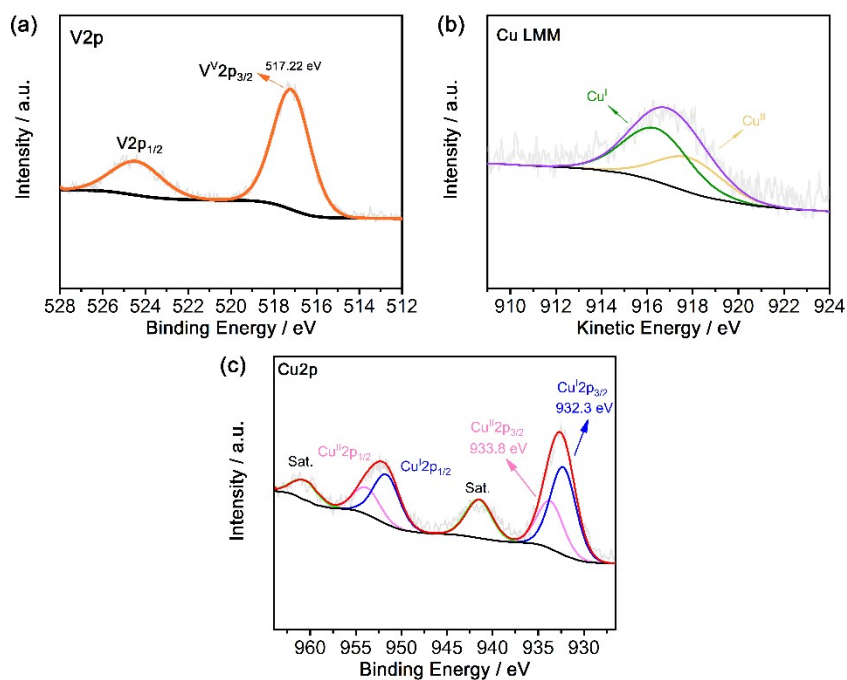

**Figure S5.** XPS spectra of V (a), Auger spectra of Cu (b) and XPS spectra of Cu (c) in **1**.

## 7. BVS for the copper ions and vanadium ions in 1

**Table S3.** BVS results for the copper ions and vanadium ions in **1**

| Metal site | BVS cacl. | Assigned O.S. |
|------------|-----------|---------------|
| Cu1        | 1.282     | 1             |
| Cu2        | 1.684     | 2             |
| V1         | 5.18      | 5             |
| V2         | 5.367     | 5             |

8. TGA curve of 1

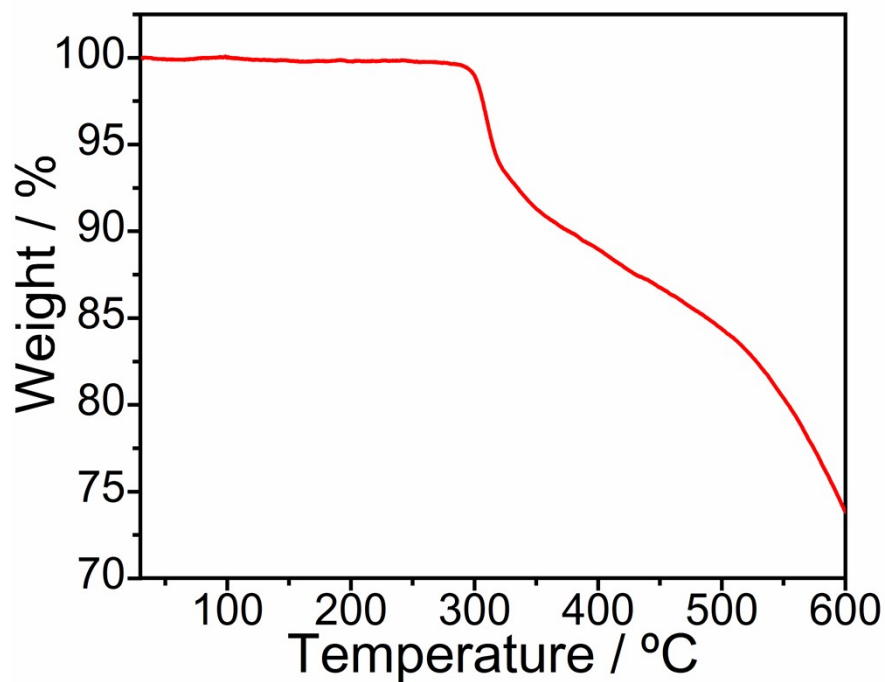

Figure S6. The TGA curve of 1.

9. PXRD patterns of 1 after immersing in various solvents

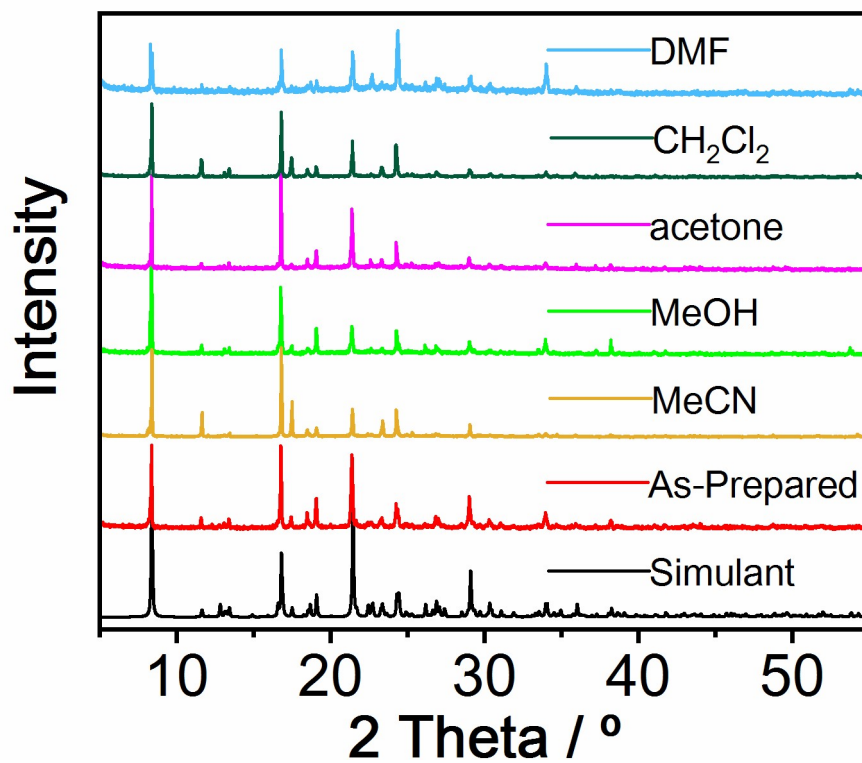

Figure S7. The PXRD patterns of 1 after immersing in various solvents for 7 days.



## 10. BET analysis of 1

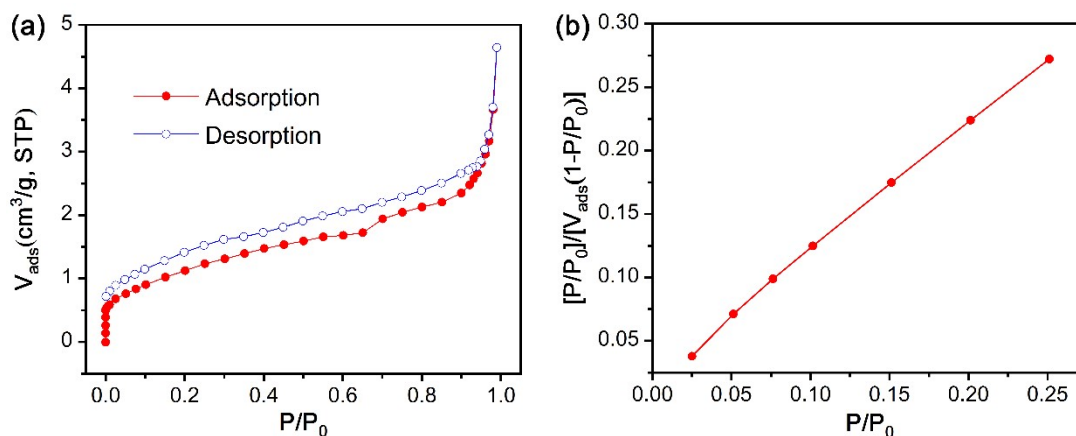

**Figure S8.** (a) BET analysis of 1. (b) The  $\text{N}_2$  absorption/ desorption isotherms were measured at 77K ( $P_0 = 101$  kPa).

## 11. Radical trapping experiments

**Table S4** Effect of radical trap on the oxidation of indane catalyzed by 1<sup>a</sup>

| Entry | Radical trap           | mmol | Yield (%) |
|-------|------------------------|------|-----------|
| 1     | -                      | -    | 96        |
| 2     | $\text{Ph}_2\text{NH}$ | 0.25 | N.D.      |
| 3     | TEMPO                  | 0.25 | 52        |
| 4     | TEMPO                  | 0.50 | 8         |

<sup>a</sup>Reaction conditions: indane (0.25 mmol),  $t\text{BuOOH}$  (0.75 mmol), 1 (0.0125 mmol, 5% mol), internal standard naphthalene (0.25 mmol), MeCN (2.0 mL), 65 °C, 24h.

## 12. Frontier molecular orbital diagrams of 1

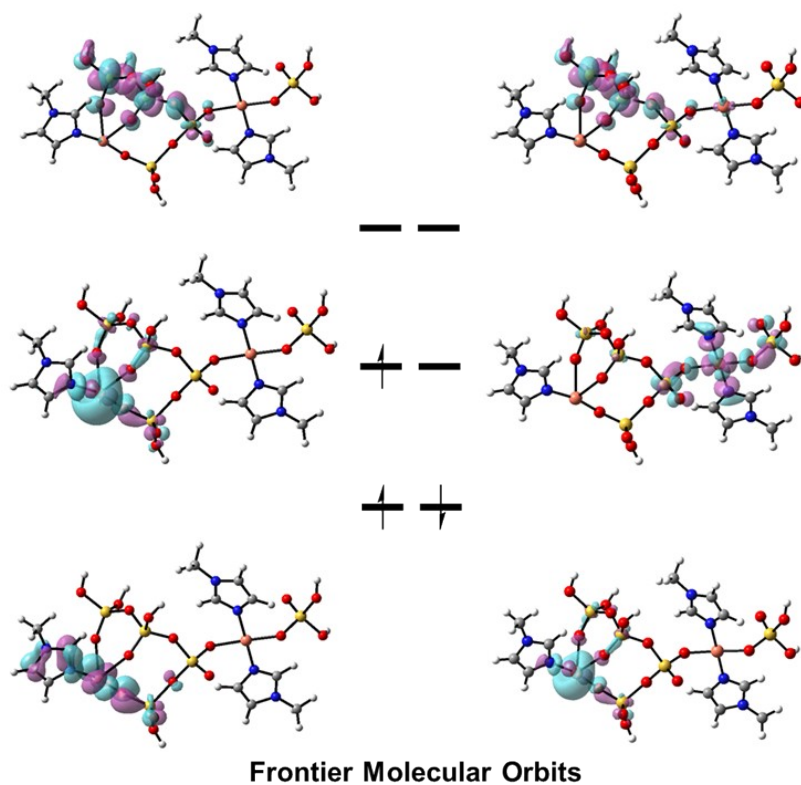

**Figure S9** Frontier molecular orbital diagrams of catalyst **1**.

## 13. Adsorption of <sup>t</sup>BuOOH on active sites in 1

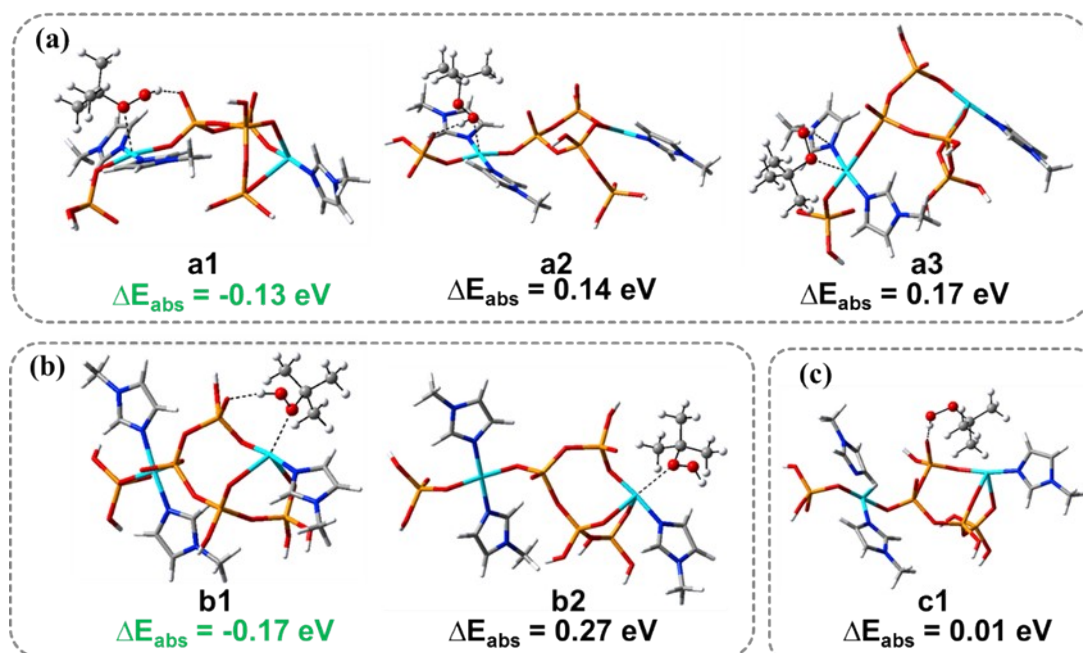

**Figure S10** The adsorption of <sup>t</sup>BuOOH on Cu<sup>II</sup>, Cu<sup>I</sup> and {V<sub>4</sub>} activated sites of catalyst **1** and the corresponding adsorption energy (eV).

## 14. Recycling tests of the 1

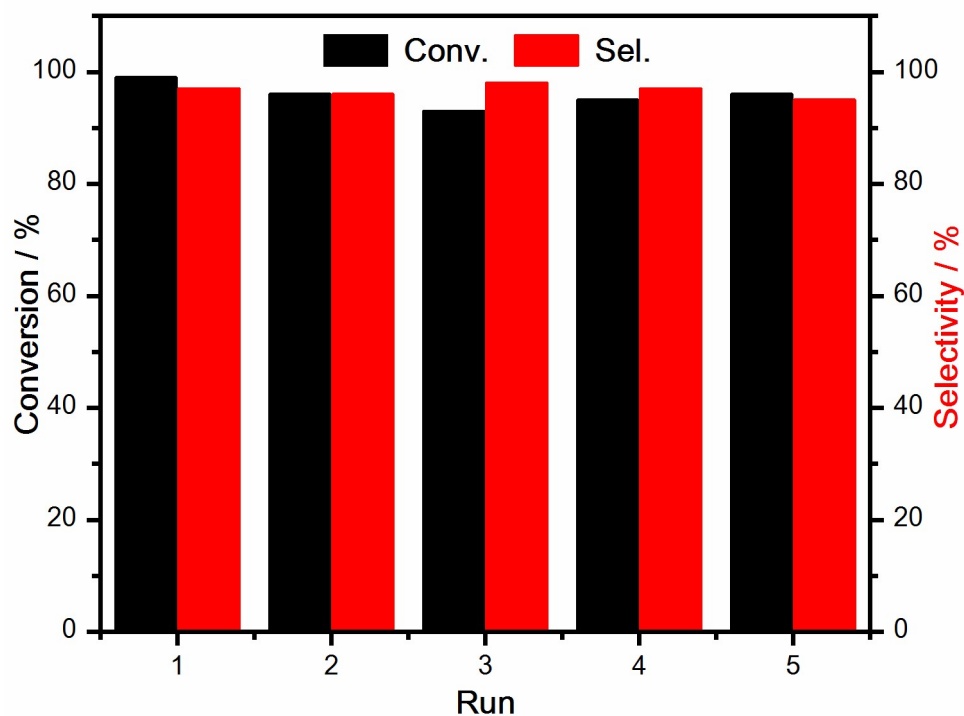

**Figure S11.** Recycling tests for benzylic compound oxidation using the **1**. Reaction conditions: indane (0.25 mmol),  $t$ BuOOH (0.75 mmol), **1** (0.0125 mmol), naphthalene (0.25 mmol), MeCN (2.0 mL), 65 °C, 24h.

## 15. SEM images of 1

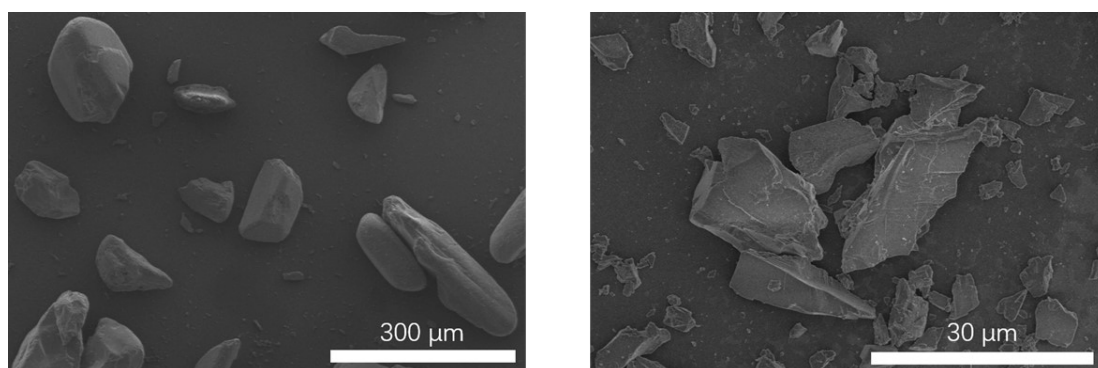

**Figure S12.** (a) SEM images of the grinded **1**; (b) SEM images of the grinded **1** after benzylic compound oxidation.

## 16. Comparison of **1** and partially reported catalysts

**Table S5** Comparison of **1** and partially reported catalysts

| Entry | Catalyst                                                                                                                                                                                                                                                                                  | T<br>(°C) | Yield (%)                                                                          |                                                                                     | Ref.      |
|-------|-------------------------------------------------------------------------------------------------------------------------------------------------------------------------------------------------------------------------------------------------------------------------------------------|-----------|------------------------------------------------------------------------------------|-------------------------------------------------------------------------------------|-----------|
|       |                                                                                                                                                                                                                                                                                           |           |  |  |           |
| 1     | [Pd(NH <sub>3</sub> ) <sub>4</sub> ] <sub>3</sub> [V <sub>10</sub> O <sub>28</sub> ]·8H <sub>2</sub> O                                                                                                                                                                                    | 90        | 14.7                                                                               | 22.2                                                                                | 1         |
| 2     | [Pd(dpa)(acac)] <sub>2</sub> [V <sub>6</sub> O <sub>13</sub> (OMe) <sub>6</sub> ]                                                                                                                                                                                                         | 65        | 73.2                                                                               | 95.8                                                                                | 2         |
| 3     | [Cu <sup>I</sup> L <sub>4</sub> ] <sub>4</sub> ·4NO <sub>3</sub>                                                                                                                                                                                                                          | 60        | 16.8                                                                               | 25.2                                                                                | 3         |
| 4     | [Na(H <sub>2</sub> O) <sub>5</sub> ](NH <sub>4</sub> ) <sub>7</sub> [P <sub>2</sub> W <sub>15</sub> O <sub>56</sub> Co <sub>3</sub> (H <sub>2</sub> O) <sub>3</sub> (OH) <sub>3</sub> Re(CO) <sub>3</sub> ]·13H <sub>2</sub> O                                                            | 90        | 87.5                                                                               | 96.8                                                                                | 4         |
| 5     | Cu <sup>I</sup> <sub>12</sub> Cl <sub>2</sub> (trz) <sub>8</sub> [HPW <sub>12</sub> O <sub>40</sub> ]                                                                                                                                                                                     | 75        | 97                                                                                 | 95                                                                                  | 5         |
| 6     | [Cu <sup>I</sup> <sub>6</sub> (trz) <sub>6</sub> {PW <sub>12</sub> O <sub>40</sub> } <sub>2</sub> ]                                                                                                                                                                                       | 75        | 90.6                                                                               | 95.2                                                                                | 6         |
| 7     | {[Cd(DMF) <sub>2</sub> Mn <sup>III</sup> (DMF) <sub>2</sub> TPyP](PW <sub>12</sub> O <sub>40</sub> )} <sub>2</sub> ·2DMF·5H <sub>2</sub> O                                                                                                                                                | 80        | 92.7                                                                               | 37                                                                                  | 7         |
| 8     | [Cu <sub>2</sub> (C <sub>33</sub> H <sub>17</sub> NO <sub>8</sub> )(H <sub>2</sub> O)]·3DMF                                                                                                                                                                                               | 65        | 30                                                                                 | 40                                                                                  | 8         |
| 9     | [Mn <sub>5</sub> Cl <sub>2</sub> (MnCl-OCPP)(DMF) <sub>4</sub> (H <sub>2</sub> O) <sub>4</sub> ]·2DMF·8C<br>H <sub>3</sub> COOH·14H <sub>2</sub> O                                                                                                                                        | 65        | 99                                                                                 | 18                                                                                  | 9         |
| 10    | [Cu <sup>II</sup> (en) <sub>2</sub> ] <sub>4</sub> {Na(H <sub>2</sub> O)(μ-OH)[B(OH) <sub>2</sub> ]} <sub>2</sub> [(V <sup>V</sup> O) <sub>2</sub> (V <sup>IV</sup> O) <sub>10</sub> O <sub>6</sub> (B <sub>18</sub> O <sub>36</sub> (OH) <sub>6</sub> )] <sub>2</sub> ·7H <sub>2</sub> O | 65        | 78.9                                                                               | -                                                                                   | 10        |
| 11    | Ni-MOF-74/[bmim]Br                                                                                                                                                                                                                                                                        | 60        | 88                                                                                 | 95                                                                                  | 11        |
| 12    | <b>1</b>                                                                                                                                                                                                                                                                                  | 65        | 98                                                                                 | 96                                                                                  | This work |

## 17. <sup>1</sup>H-NMR Spectra of the ketones

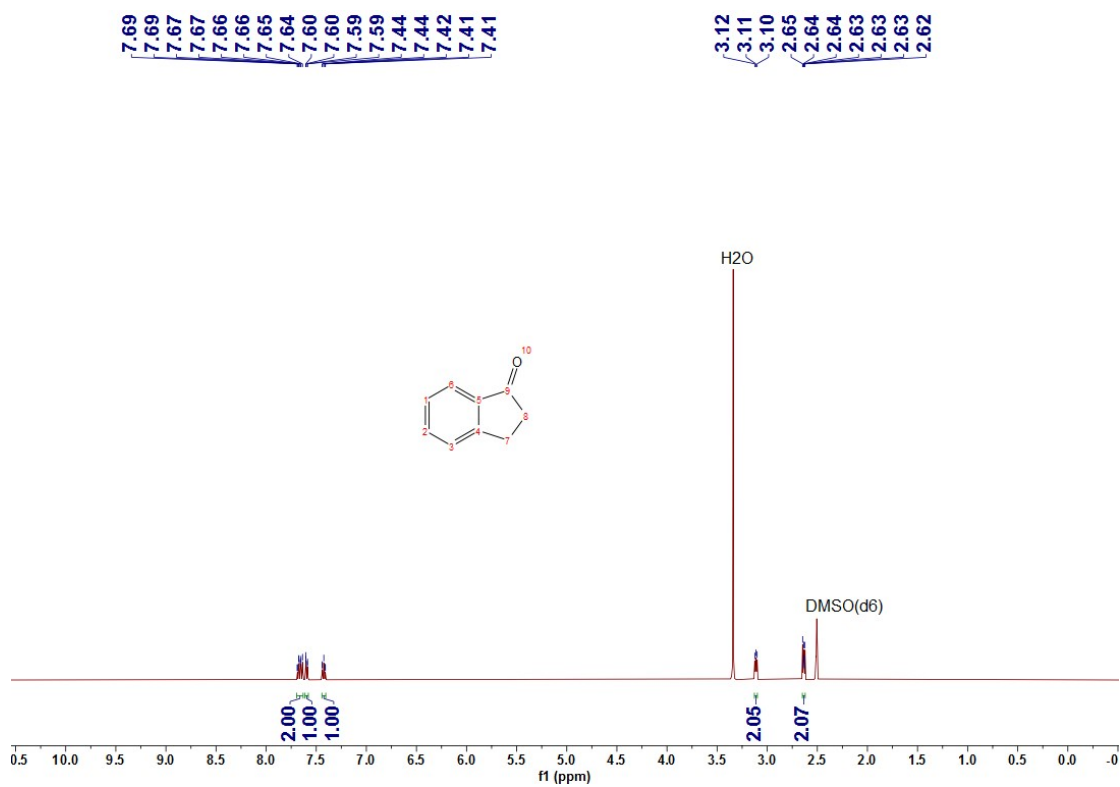

## <sup>1</sup>H-NMR Spectra of 1-indanone.

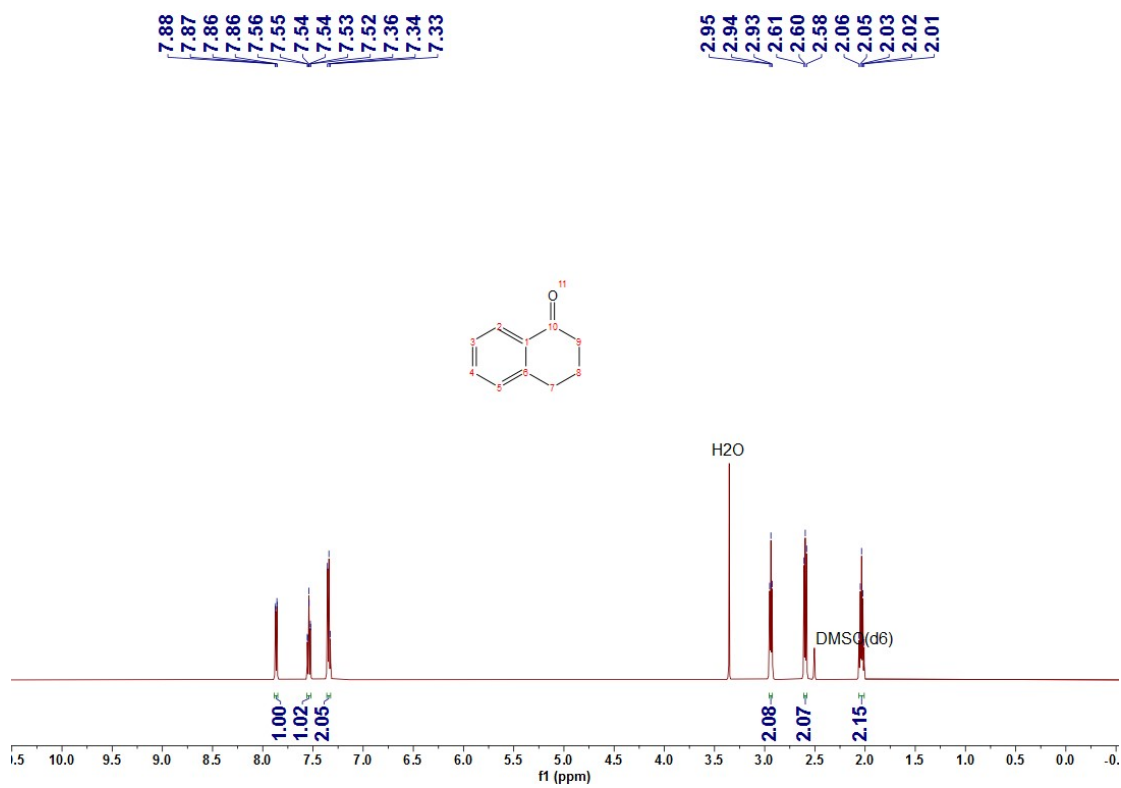

## <sup>1</sup>H-NMR Spectra of α-tetralone.

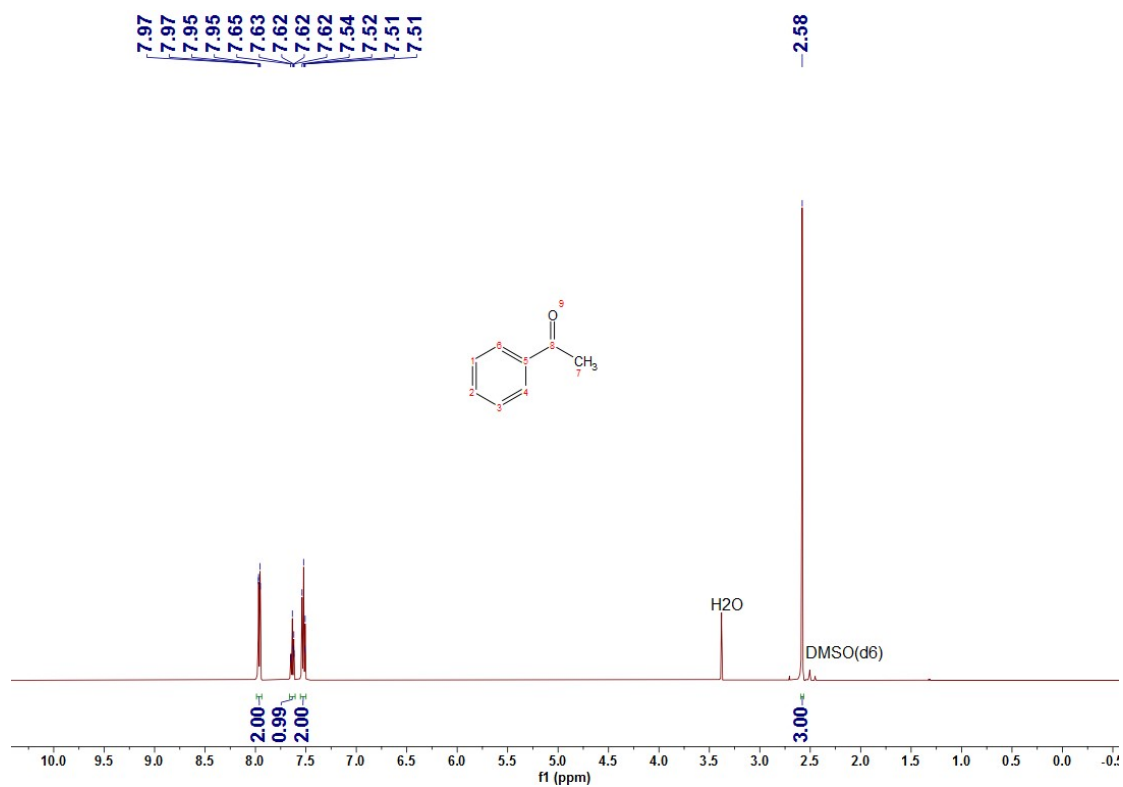

<sup>1</sup>H-NMR Spectra of acetophenone.

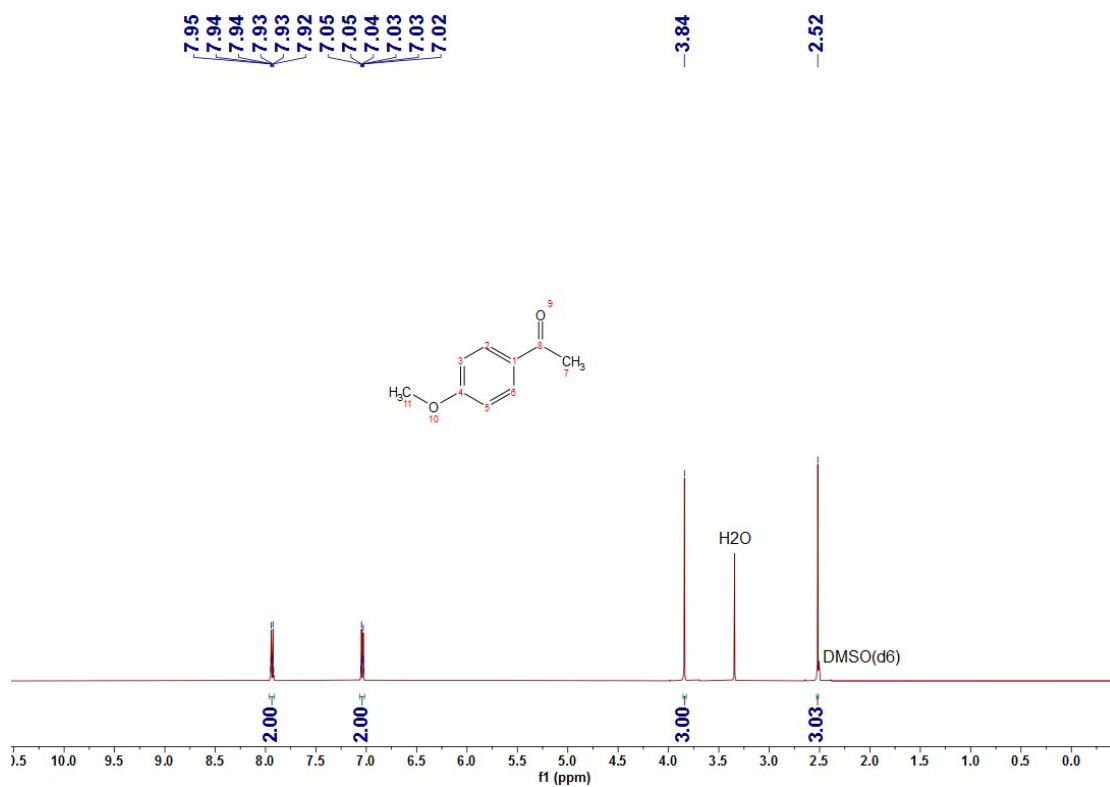

<sup>1</sup>H-NMR Spectra of 4-methoxyacetophenone.

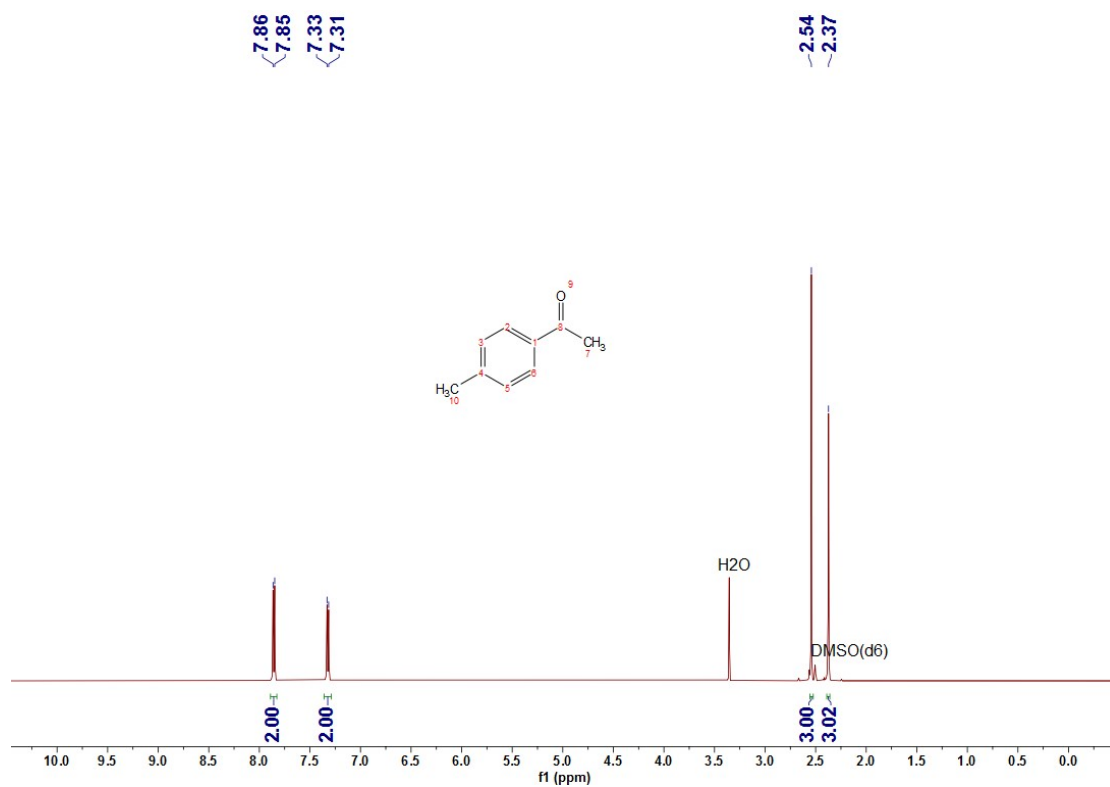

<sup>1</sup>H-NMR Spectra of 4'-methoxyacetophenone.

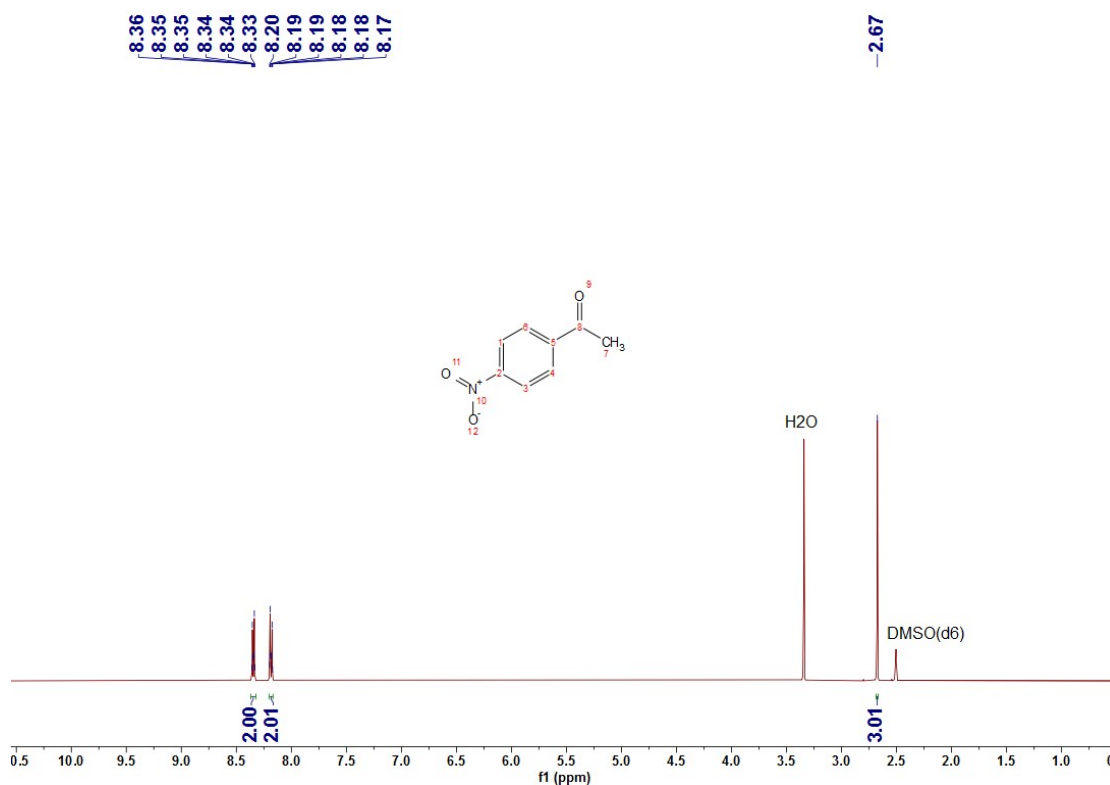

<sup>1</sup>H-NMR Spectra of 4'-nitroacetophenone.

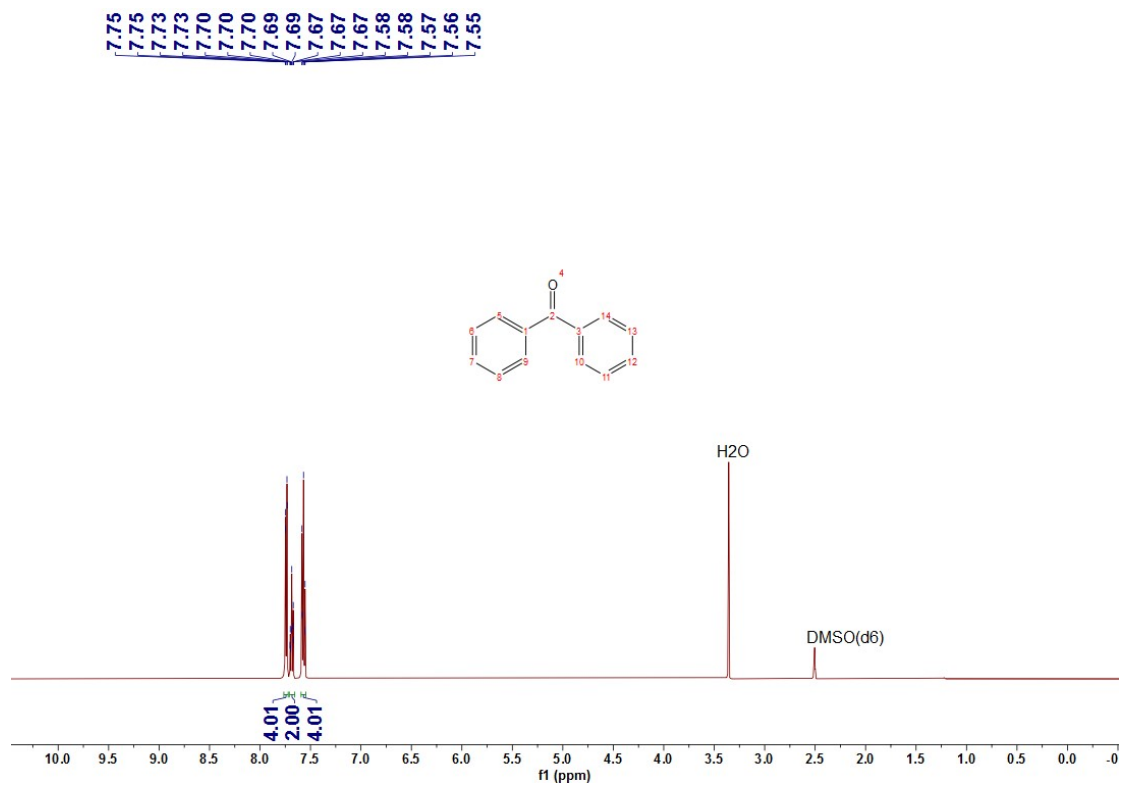

<sup>1</sup>H-NMR Spectra of benzophenone.

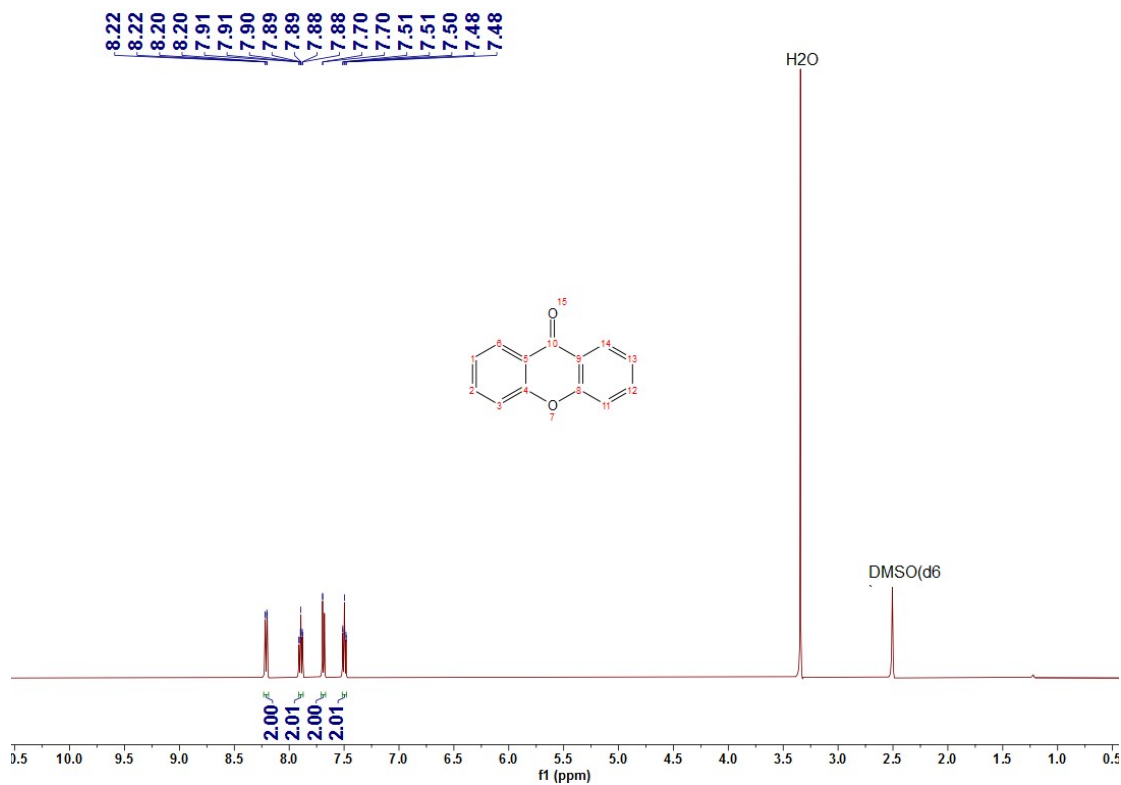

<sup>1</sup>H-NMR Spectra of xanthone.



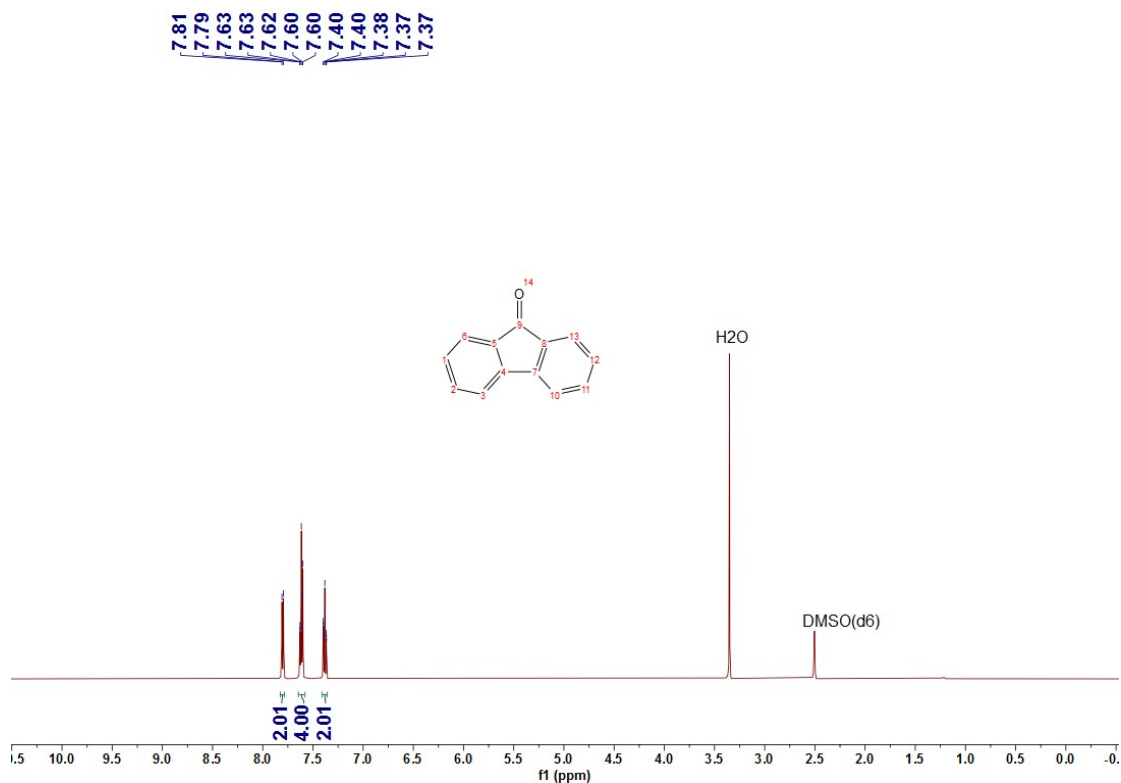

<sup>1</sup>H-NMR Spectra of 9-fluorenone.

## 18. References

1. X. Huang, J. Li, G. Shen, N. Xin, Z. Lin, Y. Chi, J. Dou, D. Li and C. Hu, *Dalton Trans.*, 2018, **47**, 726-733.
2. J.-K. Li, X.-Q. Huang, S. Yang, H.-W. Ma, Y.-N. Chi and C.-W. Hu, *Inorg. Chem.*, 2015, **54**, 1454-1461.
3. Q.-T. He, X.-P. Li, L.-F. Chen, L. Zhang, W. Wang and C.-Y. Su, *ACS Catal.*, 2013, **3**, 1-9.
4. X. Ma, P. Wang, Z. Liu, C. Xin, S. Wang, J. Jia, P. Ma, J. Niu and J. Wang, *Inorg. Chem.*, 2020, **59**, 8690-8698.
5. B. Xu, Q. Xu, Q. Wang, Z. Liu, R. Zhao, D. Li, P. Ma, J. Wang and J. Niu, *Inorg. Chem.*, 2021, **60**, 4792-4799.
6. D. Li, X. Ma, Q. Wang, P. Ma, J. Niu and J. Wang, *Inorg. Chem.*, 2019, **58**, 15832-15840.

7. C. Zou, Z. Zhang, X. Xu, Q. Gong, J. Li and C.-D. Wu, *J. Am. Chem. Soc.*, 2012, **134**, 87-90.
8. L. Kimberley, A. M. Sheveleva, J. Li, J. H. Carter, X. Kang, G. L. Smith, X. Han, S. J. Day, C. C. Tang, F. Tuna, E. J. L. McInnes, S. Yang and M. Schröder, *Angew. Chem. Int. Ed.*, 2021, **60**, 15243-15247.
9. X.-L. Yang, M.-H. Xie, C. Zou, Y. He, B. Chen, M. O’Keeffe and C.-D. Wu, *J. Am. Chem. Soc.*, 2012, **134**, 10638-10645.
10. Y. Feng, C. Ding, H. Fan, Z. Zhong, D. Qiu and H. Shi, *Dalton Trans.*, 2015, **44**, 18731-18736.
11. C. Guo, Y. Zhang, Y. Zhang and J. Wang, *Chem. Commun.*, 2018, **54**, 3701-3704.
